# Supplementary material
Source: publisher figshare collection journal article supplement (https://acs.figshare.com/ndownloader/files/17961902)
Supplement: Supplementary file 1 [file 17961902]

## Supporting Information

### **Cu(II)Complexes with FomA Protein Fragments of *F. Nucleatum* Increase Oxidative Stress and Malondialdehyde Level.**

Monika K. Lesiów,<sup>a</sup> Piotr Pietrzyk,<sup>b</sup> Agnieszka Kyzioł,<sup>b,\*</sup> Urszula K. Komarnicka<sup>a,\*</sup>

<sup>a</sup>*Faculty of Chemistry, University of Wrocław, F. Joliot-Curie 14, 50-383 Wrocław, Poland*

<sup>b</sup>*Faculty of Chemistry, Jagiellonian University, Gronostajowa 2, 30-387 Kraków, Poland*

\*corresponding authors e-mail: urszula.komarnicka@chem.uni.wroc.pl

**Figure S1.** The reduction of ROS production in CT26 cells incubated with A) **1L**, B) **2L**, C) **2Cu**, D) **CuCl<sub>2</sub>** and E) **ctrl(+): H<sub>2</sub>O<sub>2</sub>** as a positive control at various concentrations of compounds: 0.001, 0.005, 0.01, 0.05, 0.1 and 1 mM) with increasing incubation time (from 5 min to 24 h) using H<sub>2</sub>DCF-DA. (page S2)

**Figure S2.** The MDA concentration in CT26 cells treatment with **1L**, **2L**, **1Cu**, **2Cu**, **CuCl<sub>2</sub>**, **H<sub>2</sub>O<sub>2</sub>** at 0.001, 0.005, 0.01, 0.05, 0.1 and 1 mM of compounds after A) 5 min, B) 3 h, C) 24 h incubation of the cells with substances. (page S3)

**Figure S3.** Experimental (solid lines) and simulated (dotted lines) EPR spectra of spin adducts for cells treated with 1 mM of **1Cu** (A1, B1 and C1) and **2Cu** (A2, B2 and C2). Subsequent spectra were measured in A) supernatant, B) lysed cell pellets, and C) mixture of supernatant with lysed cell pellets. Triple-dot marks indicate spurious signal due to degradation of spin trap. (page S4)

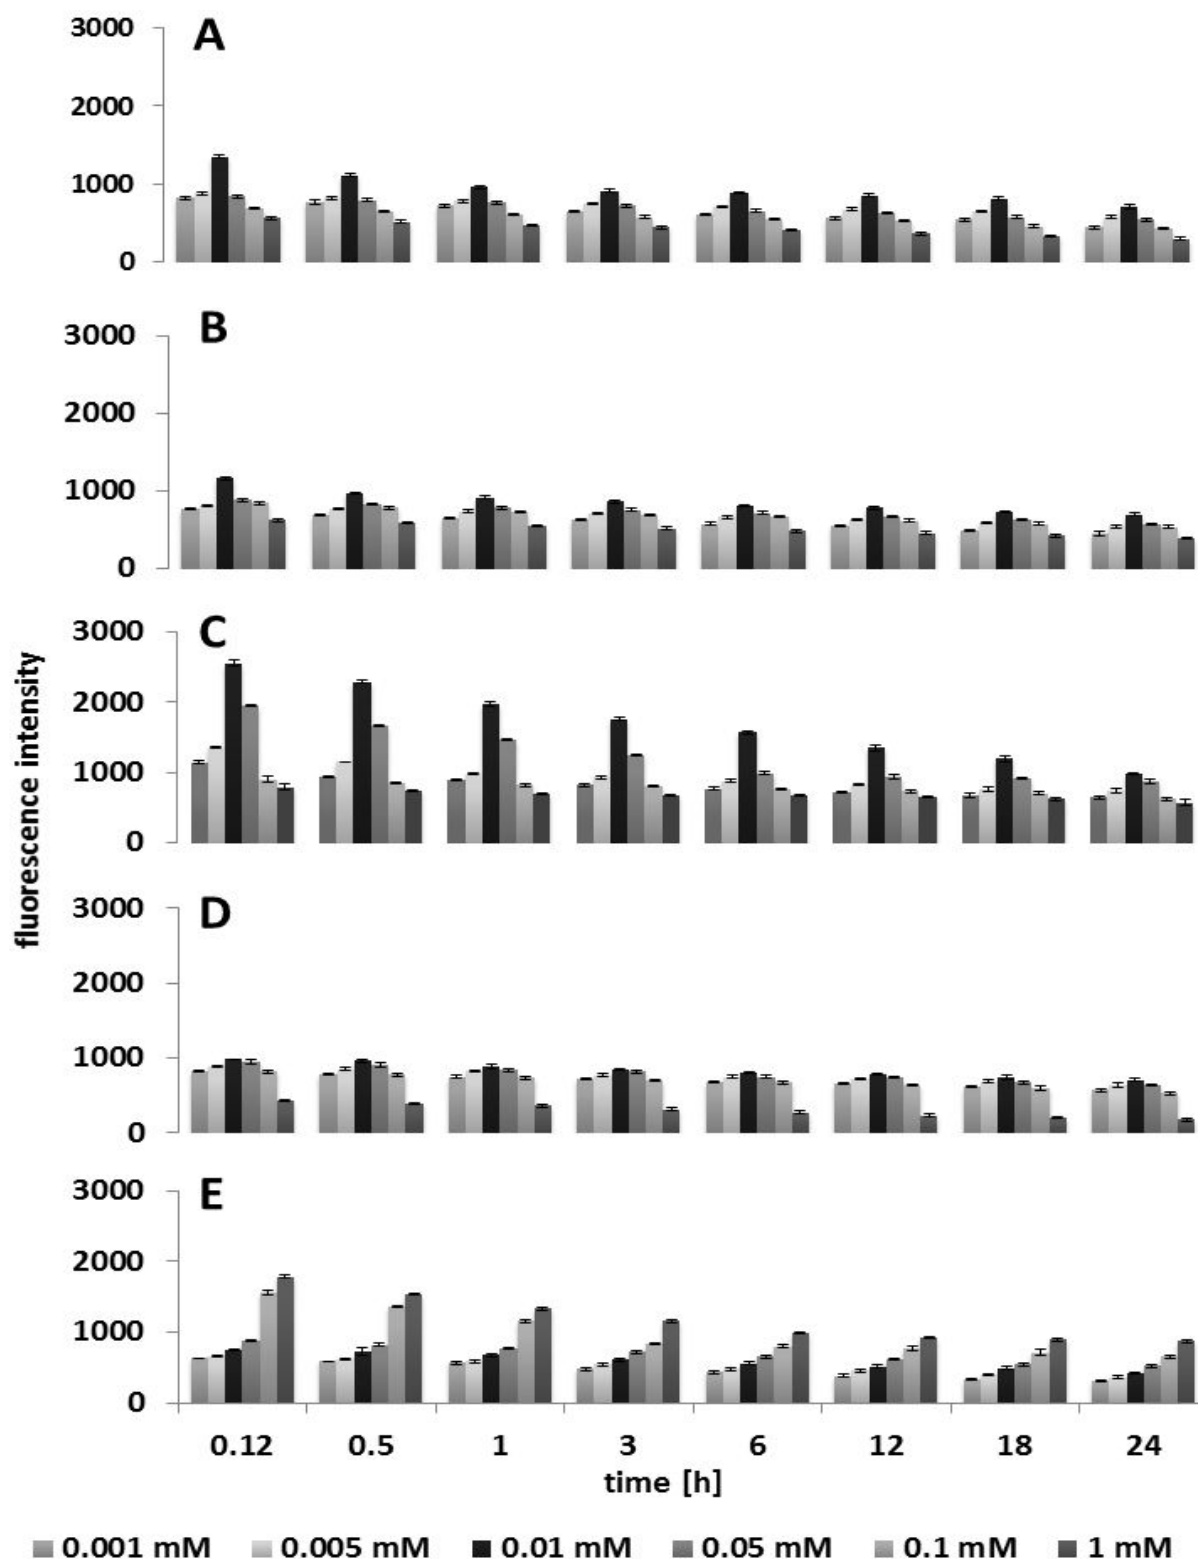

**Figure S1.** The reduction of ROS production in CT26 cells incubated with A) **1L**, B) **2L**, C) **2Cu**, D) **CuCl<sub>2</sub>** and E) **ctrl(+): H<sub>2</sub>O<sub>2</sub>** as a positive control at various concentrations of compounds: 0.001, 0.005, 0.01, 0.05, 0.1 and 1 mM) with increasing incubation time (from 5 min to 24 h) using H<sub>2</sub>DCF-DA.

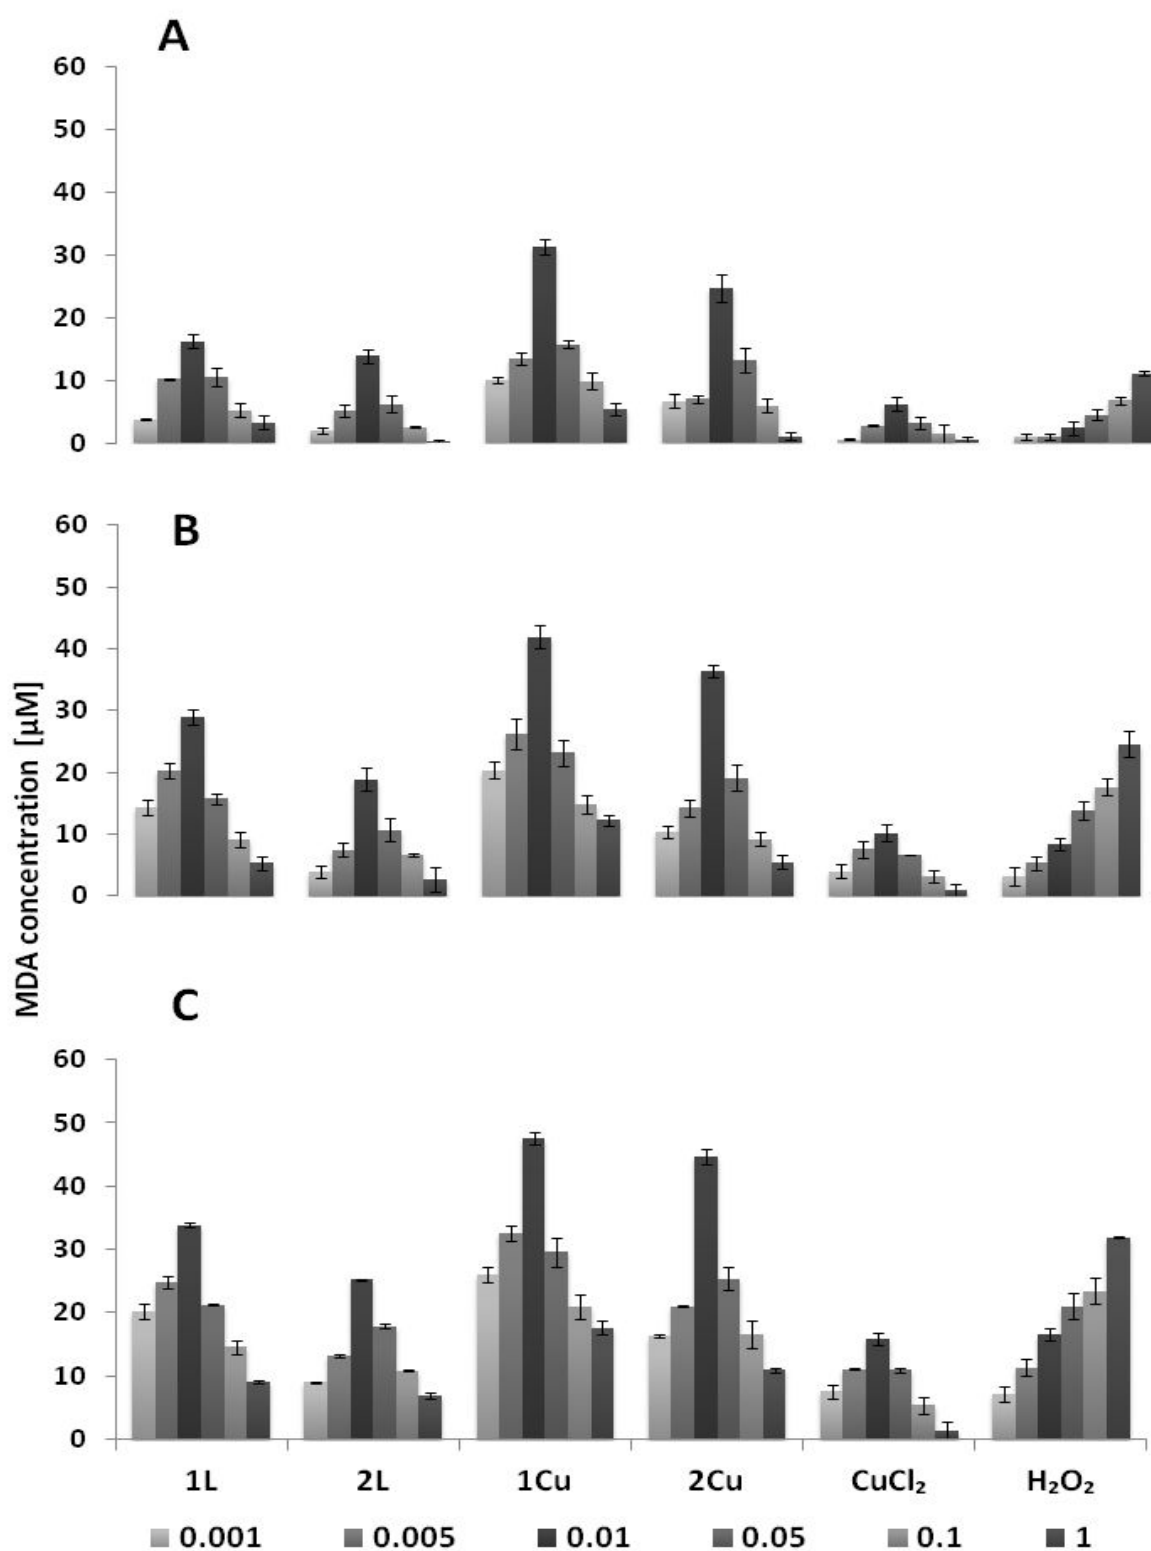

**Figure S2.** The MDA concentration in CT26 cells treatment with 1L, 2L, 1Cu, 2Cu,  $\text{CuCl}_2$ ,  $\text{H}_2\text{O}_2$  at 0.001, 0.005, 0.01, 0.05, 0.1 and 1mM of compounds after A) 5min, B) 3h, C) 24h incubation of the cells with substances.

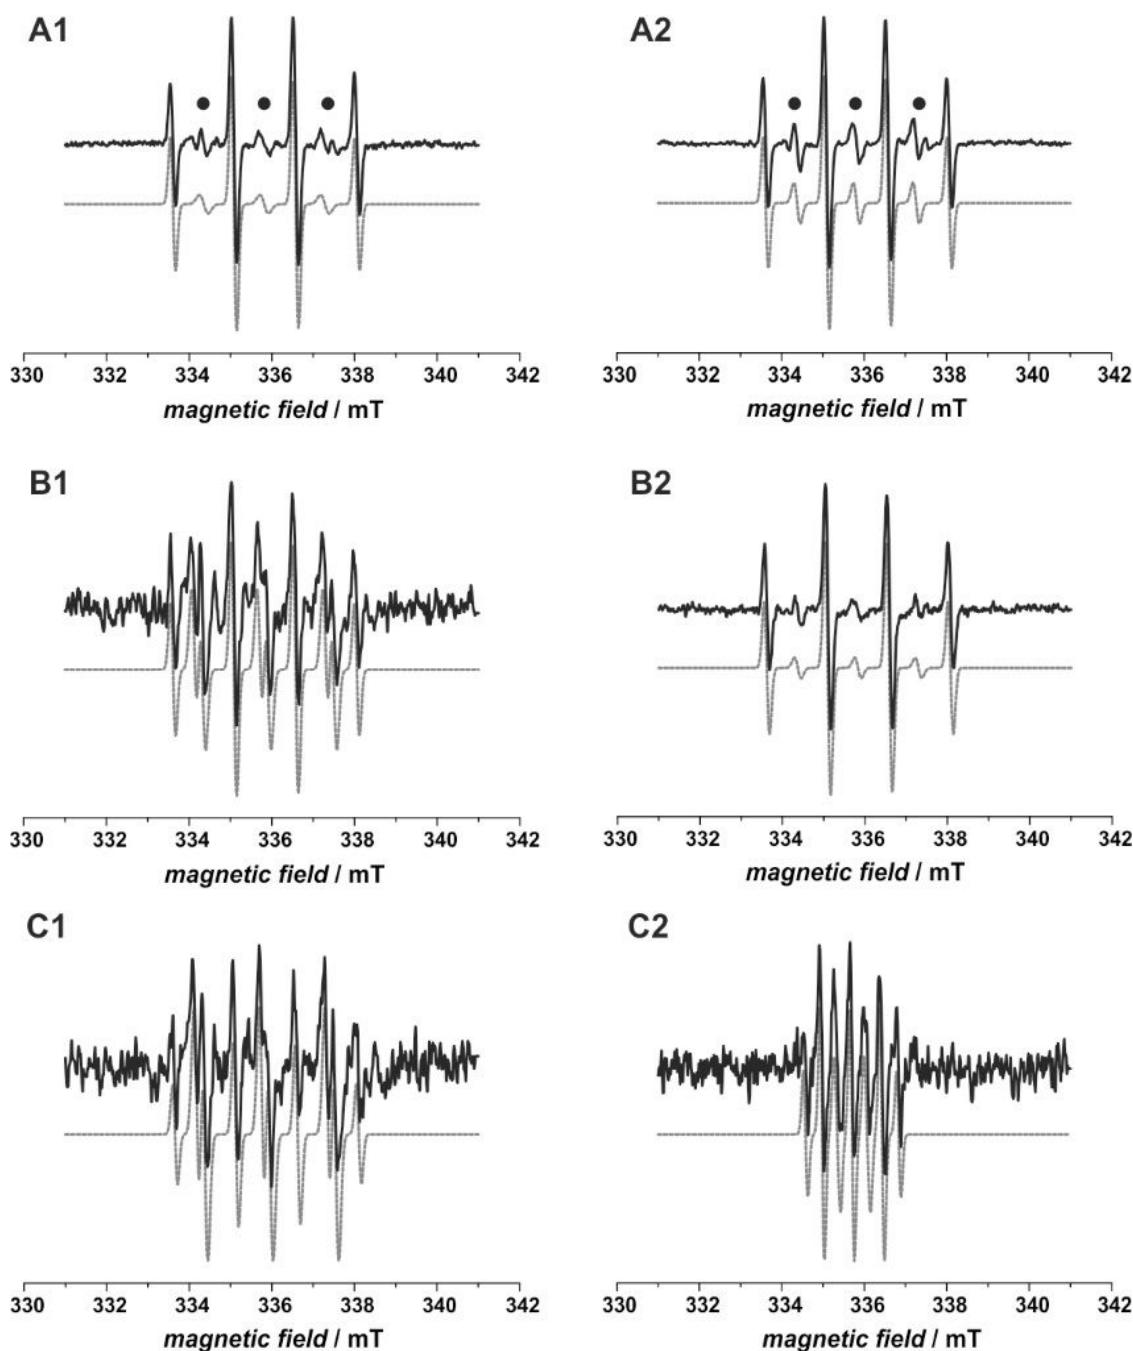

**Figure S3.** Experimental (solid lines) and simulated (dotted lines) EPR spectra of spin adducts for cells treated with 1 mM of **1Cu** (A1, B1 and C1) and **2Cu** (A2, B2 and C2). Subsequent spectra were measured in A) supernatant, B) lysed cell pellets, and C) mixture of supernatant with lysed cell pellets. Triple-dot marks indicate spurious signal due to degradation of spin trap.
